# Supplementary material for: The Parental Stress Scale revisited: Rasch-based construct validity for Danish parents of children 2–18 years old with and without behavioral problems
Source: Springer Nature journal article supplement (doi:10.1186/s12955-020-01495-w), 2020-08-17
Supplement: MOESM1 [file 18288532]

# Additional file 1:

Original item numbers from Berry & Jones (1995)

| study                     | method         | 1                  | 2                  | 5                  | 6                  | 7                  | 8                  | 17                 | 18                 | 3                  | 4                  | 9                  | 10                 | 11                 | 12                 | 13                 | 14                 | 15                 | 16                 |                    |
|---------------------------|----------------|--------------------|--------------------|--------------------|--------------------|--------------------|--------------------|--------------------|--------------------|--------------------|--------------------|--------------------|--------------------|--------------------|--------------------|--------------------|--------------------|--------------------|--------------------|--------------------|
| Berry & Jones (1995)      | EFA            | parental stressors | parental stressors | parental stressors | parental stressors | parental stressors | parental stressors | parental stressors | parental stressors | parental stressors | parental stressors | parental stressors | parental stressors | parental stressors | parental stressors | parental stressors | parental stressors | parental stressors | parental stressors | parental stressors |
| Pontoppidan et al. (2018) | RM, PCM, GLLRM | *                  | parental stressors | parental stressors | parental stressors | parental stressors | parental stressors | *                  | *                  | *                  | *                  | *                  | *                  | parental stressors | *                  | parental stressors | parental stressors | parental stressors | parental stressors | *                  |
| Oronoz et al (2007)       | EFA            | parental stressors | parental stressors | parental stressors | parental stressors | parental stressors | parental stressors | parental stressors | parental stressors | parental stressors | parental stressors | parental stressors | parental stressors | parental stressors | parental stressors | parental stressors | parental stressors | parental stressors | parental stressors | parental stressors |
| Cheung (2000)             | PCA            | parental stressors | parental stressors | parental stressors | parental stressors | parental stressors | parental stressors | parental stressors | parental stressors | parental stressors | parental stressors | parental stressors | parental stressors | parental stressors | parental stressors | parental stressors | parental stressors | parental stressors | parental stressors | parental stressors |
| Leung & Tsang (2010)      | RSM            | parental stressors | parental stressors | parental stressors | parental stressors | **                 | parental stressors | parental stressors | parental stressors | parental stressors | **                 | **                 | parental stressors | parental stressors | parental stressors | **                 | parental stressors | **                 | **                 | **                 |
| Algarvio et al (2018)     | CFA            | (*)                | parental stressors | parental stressors | parental stressors | parental stressors | parental stressors | (*)                | parental stressors | parental stressors | parental stressors | parental stressors | parental stressors | parental stressors | parental stressors | parental stressors | parental stressors | parental stressors | parental stressors | parental stressors |
| Brito & Faro (2017)       | EFA            | parental stressors | parental stressors | parental stressors | parental stressors | parental stressors | parental stressors | parental stressors | parental stressors | parental stressors | parental stressors | parental stressors | parental stressors | parental stressors | parental stressors | parental stressors | parental stressors | parental stressors | parental stressors | parental stressors |

Additional file 1: Figure 1 Division of PSS items into factors and/or subscales in six previous studies related to the structure in the original development study by Berry & Jones (1995)

Notes. EFA = Exploratory factor analysis, RM = Rasch model, PCM = partial credit model, GLLRM = graphical loglinear Rasch model, PCA = principle component analysis, RSM = rating scale model, CFA = confirmatory factor analysis, \* = locally dependent items (in studies where no items are marked this has not been investigated), (\*) = locally dependent items, which were eliminated, \*\* = DIF items (in studies where no items are marked this has not been investigated). Subscale colouring takes departure in the four factors in Berry and Jones (1995) development study (colour legend below), with factors/subscales in the other studies coloured accordingly.

Colour legend:

-  = parental stressors
-  = lack of control
-  = parental satisfaction
-  = parental rewards
-  = item eliminated
-  = additional and unique subdivision in Algarvio et al (2018)

Additional file 1: Table 1 Item fit statistics for the Parental Stress subscale under the RM and the GLLRM for the combined total sample

| Model & items                                      | outfit | <i>p</i>            | infit | <i>p</i>           | Observed $\gamma$ | Expected $\gamma$ | <i>p</i>            |
|----------------------------------------------------|--------|---------------------|-------|--------------------|-------------------|-------------------|---------------------|
| <b>Rasch model</b>                                 |        |                     |       |                    |                   |                   |                     |
| 3                                                  | 0.769  | 0.212               | 0.849 | 0.014 <sup>+</sup> | 0.668             | 0.562             | 0.017 <sup>+</sup>  |
| 4                                                  | 1.230  | 0.310               | 1.045 | 0.517              | 0.503             | 0.568             | 0.181               |
| 9                                                  | 0.901  | 0.250               | 0.912 | 0.031 <sup>+</sup> | 0.606             | 0.538             | 0.065               |
| 10                                                 | 1.327  | 0.081               | 1.107 | 0.062              | 0.498             | 0.562             | 0.157               |
| 12                                                 | 0.850  | 0.082               | 0.923 | 0.060              | 0.600             | 0.539             | 0.102               |
| 13                                                 | 1.000  | 0.287               | 1.051 | 0.238              | 0.507             | 0.544             | 0.334               |
| 14                                                 | 1.593  | 0.096               | 1.023 | 0.844              | 0.549             | 0.625             | 0.231               |
| 15                                                 | 1.291  | 0.004 <sup>+</sup>  | 1.103 | 0.050              | 0.461             | 0.549             | 0.023 <sup>+</sup>  |
| 16                                                 | 0.962  | 0.823               | 0.889 | 0.093              | 0.642             | 0.586             | 0.209               |
| <b>Graphical loglinear Rasch model<sup>a</sup></b> |        |                     |       |                    |                   |                   |                     |
| 3                                                  | 0.793  | 0.274               | 0.890 | 0.101              | 0.668             | 0.594             | 0.093               |
| 4                                                  | 1.451  | 0.086               | 1.150 | 0.050              | 0.503             | 0.624             | 0.009 <sup>++</sup> |
| 9                                                  | 0.999  | 0.994               | 0.972 | 0.539              | 0.606             | 0.585             | 0.544               |
| 10                                                 | 1.146  | 0.381               | 1.006 | 0.917              | 0.498             | 0.497             | 0.983               |
| 12                                                 | 0.867  | 0.130               | 0.940 | 0.163              | 0.600             | 0.554             | 0.214               |
| 13                                                 | 1.010  | 0.896               | 1.029 | 0.516              | 0.507             | 0.523             | 0.692               |
| 14                                                 | 1.350  | 0.241               | 1.005 | 0.966              | 0.549             | 0.590             | 0.546               |
| 15                                                 | 1.182  | 0.039 <sup>++</sup> | 1.069 | 0.123              | 0.461             | 0.522             | 0.128               |
| 16                                                 | 0.902  | 0.509               | 0.884 | 0.087              | 0.642             | 0.574             | 0.139               |

Notes.  $\gamma$  = Goodman & Kruskal's gamma coefficients. RM: Rasch model; GLLRM: Graphical loglinear Rasch model

The critical limits for the p-values after adjusting for false discovery rate were: <sup>+</sup> 5% limit  $p = .00185$ , <sup>++</sup> 5% limit  $p = .00172$ , thus no items showed significant misfit.

<sup>a</sup> The GLLRM for the Parental Stress subscale assumed that some items pairs are locally dependent (items 3 and 4, and items 9 and 12), that item 9 and 13 functions differentially relative to child sample, that item 4, 15 and 16 functions differentially relative to parent educational level.

Additional file 1: Table 2 Item fit statistics for the Lack of Parental Satisfaction subscale under the RM and the GLLRM for the total sample

| Model & items      | Outfit | <i>p</i> | infit | <i>P</i> | Observed $\gamma$ | Expected $\gamma$ | <i>p</i> |
|--------------------|--------|----------|-------|----------|-------------------|-------------------|----------|
| <b>Rasch model</b> |        |          |       |          |                   |                   |          |
| 1                  | 0.889  | 0.455    | 0.860 | 0.140    | 0.721             | 0.675             | 0.448    |
| 5                  | 1.023  | 0.935    | 1.144 | 0.309    | 0.718             | 0.743             | 0.727    |
| 6                  | 0.462  | 0.063    | 0.809 | 0.189    | 0.892             | 0.747             | 0.049    |

|                                              |       |       |       |       |       |       |       |
|----------------------------------------------|-------|-------|-------|-------|-------|-------|-------|
| 7                                            | 1.372 | 0.240 | 1.281 | 0.068 | 0.604 | 0.754 | 0.050 |
| 8                                            | 1.252 | 0.128 | 1.036 | 0.669 | 0.538 | 0.579 | 0.466 |
| 17                                           | 0.845 | 0.246 | 0.897 | 0.250 | 0.725 | 0.661 | 0.278 |
| 18                                           | 1.372 | 0.352 | 0.958 | 0.818 | 0.694 | 0.768 | 0.391 |
| <hr/>                                        |       |       |       |       |       |       |       |
| Graphical loglinear Rasch model <sup>a</sup> |       |       |       |       |       |       |       |
| 1                                            | 1.150 | 0.458 | 1.040 | 0.726 | 0.721 | 0.772 | 0.297 |
| 5                                            | 0.822 | 0.457 | 0.995 | 0.971 | 0.718 | 0.648 | 0.420 |
| 6                                            | 0.627 | 0.344 | 1.027 | 0.868 | 0.892 | 0.852 | 0.458 |
| 7                                            | 1.045 | 0.867 | 1.096 | 0.530 | 0.604 | 0.658 | 0.564 |
| 8                                            | 1.047 | 0.717 | 1.004 | 0.964 | 0.538 | 0.547 | 0.877 |
| 17                                           | 0.916 | 0.568 | 0.952 | 0.605 | 0.725 | 0.697 | 0.611 |
| 18                                           | 1.045 | 0.894 | 0.895 | 0.565 | 0.694 | 0.670 | 0.819 |

Notes.  $\gamma$  = Goodman & Kruskal's gamma coefficients. RM: Rasch model; GLLRM: Graphical loglinear Rasch model

<sup>a</sup>The GLLRM for the Lack of Parental Stress subscale assumed that items 1 and 6, and items 1 and 17 are locally dependent and that item 1 functions differentially relative to child sample.

Additional file 1: Table 3 Item fit statistics for the Parental stress and Lack of Parental Satisfaction subscales to the final models for the behavior sample

| Subscale & items                                 | Outfit | <i>p</i>           | infit | <i>P</i> | Observed $\gamma$ | Expected $\gamma$ | <i>P</i> |
|--------------------------------------------------|--------|--------------------|-------|----------|-------------------|-------------------|----------|
| <b>Parental Stress<sup>a</sup></b>               |        |                    |       |          |                   |                   |          |
| 3                                                | 0.865  | 0.760              | 0.858 | 0.279    | 0.660             | 0.586             | 0.411    |
| 4                                                | 1.076  | 0.884              | 1.071 | 0.634    | 0.543             | 0.587             | 0.654    |
| 9                                                | 0.804  | 0.312              | 0.910 | 0.291    | 0.621             | 0.565             | 0.419    |
| 10                                               | 0.962  | 0.904              | 1.050 | 0.640    | 0.546             | 0.582             | 0.648    |
| 12                                               | 0.678  | 0.047              | 0.849 | 0.057    | 0.667             | 0.555             | 0.102    |
| 13                                               | 1.125  | 0.581              | 1.100 | 0.278    | 0.496             | 0.572             | 0.295    |
| 14                                               | 0.989  | 0.985              | 1.028 | 0.887    | 0.549             | 0.593             | 0.680    |
| 15                                               | 1.499  | 0.002 <sup>+</sup> | 1.112 | 0.161    | 0.436             | 0.527             | 0.201    |
| 16                                               | 0.940  | 0.789              | 0.935 | 0.504    | 0.587             | 0.549             | 0.612    |
| <b>Lack of Parental Satisfaction<sup>b</sup></b> |        |                    |       |          |                   |                   |          |
| 1                                                | 0.937  | 0.688              | 0.974 | 0.808    | 0.660             | 0.655             | 0.955    |
| 5                                                | 0.982  | 0.958              | 1.214 | 0.296    | 0.720             | 0.726             | 0.950    |
| 6                                                | 0.565  | 0.232              | 0.852 | 0.487    | 0.855             | 0.730             | 0.238    |
| 7                                                | 1.517  | 0.318              | 1.206 | 0.441    | 0.574             | 0.749             | 0.162    |
| 8                                                | 0.866  | 0.556              | 0.994 | 0.942    | 0.632             | 0.632             | 0.999    |
| 17                                               | 0.981  | 0.922              | 0.976 | 0.864    | 0.687             | 0.682             | 0.953    |
| 18                                               | 1.220  | 0.607              | 0.871 | 0.587    | 0.696             | 0.740             | 0.702    |

Notes.  $\gamma$  = Goodman & Kruskal's gamma coefficients. RM: Rasch model; GLLRM: Graphical loglinear Rasch model

<sup>+</sup> Benjamini-Hochberg adjusted critical levels were: 5% limit  $p = .00185$ , 1% limit  $p = .00037$ .

<sup>a</sup> The GLLRM for the Parental Stress subscale assumed that item 15 and 16 functions differentially relative to parent educational level.

<sup>b</sup> The Lack of Parental Satisfaction subscale fit a Rasch model in the behavior sample.

Additional file 1: Table 4 Item fit statistics for the Parental stress and Lack of Parental Satisfaction subscales to the final models for the ordinary sample

| Subscales & items                          | Outfit | <i>p</i> | infit | <i>p</i>           | Observed $\gamma$ | Expected $\gamma$ | <i>P</i>           |
|--------------------------------------------|--------|----------|-------|--------------------|-------------------|-------------------|--------------------|
| <b>Parental Stress<sup>a</sup></b>         |        |          |       |                    |                   |                   |                    |
| 3                                          | 0.845  | 0.501    | 0.955 | 0.569              | 0.654             | 0.623             | 0.527              |
| 4                                          | 1.465  | 0.059    | 1.115 | 0.179              | 0.479             | 0.593             | 0.040 <sup>+</sup> |
| 9                                          | 0.948  | 0.584    | 0.931 | 0.162              | 0.566             | 0.505             | 0.195              |
| 10                                         | 1.334  | 0.137    | 1.010 | 0.888              | 0.520             | 0.517             | 0.949              |
| 12                                         | 0.862  | 0.147    | 0.897 | 0.036 <sup>+</sup> | 0.590             | 0.504             | 0.062              |
| 13                                         | 0.996  | 0.979    | 1.065 | 0.307              | 0.495             | 0.532             | 0.469              |
| 14                                         | 1.746  | 0.066    | 1.024 | 0.869              | 0.515             | 0.624             | 0.190              |
| 15                                         | 1.100  | 0.373    | 1.067 | 0.227              | 0.454             | 0.517             | 0.192              |
| 16                                         | 0.989  | 0.959    | 0.880 | 0.185              | 0.623             | 0.577             | 0.441              |
| <b>Lack of Parental Stress<sup>b</sup></b> |        |          |       |                    |                   |                   |                    |
| 1                                          | 1.229  | 0.609    | 0.992 | 0.970              | 0.834             | 0.866             | 0.564              |
| 5                                          | 0.956  | 0.901    | 0.959 | 0.826              | 0.677             | 0.639             | 0.754              |
| 6                                          | 0.787  | 0.723    | 1.141 | 0.571              | 0.898             | 0.875             | 0.732              |
| 7                                          | 0.965  | 0.918    | 1.053 | 0.771              | 0.622             | 0.637             | 0.904              |
| 8                                          | 1.173  | 0.343    | 1.009 | 0.952              | 0.553             | 0.568             | 0.847              |
| 17                                         | 0.852  | 0.486    | 0.929 | 0.572              | 0.747             | 0.710             | 0.600              |
| 18                                         | 1.075  | 0.894    | 0.944 | 0.849              | 0.691             | 0.659             | 0.849              |

Notes.  $\gamma$  = Goodman & Kruskal's gamma coefficients. RM: Rasch model; GLLRM: Graphical loglinear Rasch model;

<sup>+</sup> Benjamini-Hochberg adjusted critical level 5% limit was  $p = .00179$ .

<sup>a</sup> The GLLRM for the Parental Stress subscale assumed that items 3 and 4 were locally dependent and that item 4 functions differentially relative to child age.

<sup>b</sup> The GLLRM for the Lack of Parental Satisfaction subscale assumed that items 1 and 6 and items 1 and 17 were locally dependent.
