# Supplementary material for: The Parental Stress Scale revisited: Rasch-based construct validity for Danish parents of children 2–18 years old with and without behavioral problems
Source: Springer Nature journal article supplement (doi:10.1186/s12955-020-01495-w), 2020-08-17
Supplement: MOESM3 [file 18288532]

## Additional file 3:

Consistency tables with marginal associations among items as well as between items and restscores (i.e. item correlation with the scale score with this item subtracted). Correlations are gamma correlations.

### Lack of parental satisfaction subscale

#### Behavior sample

| items |       | A     | E     | F     | G     | H     | Q     | R     | rest score |
|-------|-------|-------|-------|-------|-------|-------|-------|-------|------------|
| A     | pss1  |       | 0.605 | 0.880 | 0.274 | 0.657 | 0.754 | 0.831 | 0.660      |
|       | Gamma |       | 0.018 | 0.000 | 0.246 | 0.000 | 0.000 | 0.003 | 0.000      |
|       | p     |       |       |       |       |       |       |       |            |
| E     | pss5  | 0.605 |       | 0.773 | 0.554 | 0.758 | 0.587 | 0.632 | 0.720      |
|       | Gamma | 0.018 |       | 0.024 | 0.160 | 0.001 | 0.037 | 0.091 | 0.000      |
|       | p     |       |       |       |       |       |       |       |            |
| F     | pss6  | 0.880 | 0.773 |       | 0.843 | 0.737 | 0.771 | 0.845 | 0.855      |
|       | Gamma | 0.000 | 0.024 |       | 0.031 | 0.002 | 0.006 | 0.018 | 0.000      |
|       | p     |       |       |       |       |       |       |       |            |
| G     | pss7  | 0.274 | 0.554 | 0.843 |       | 0.788 | 0.470 | 0.658 | 0.574      |
|       | Gamma | 0.246 | 0.160 | 0.031 |       | 0.006 | 0.141 | 0.132 | 0.017      |
|       | p     |       |       |       |       |       |       |       |            |
| H     | pss8  | 0.657 | 0.758 | 0.737 | 0.788 |       | 0.663 | 0.652 | 0.632      |
|       | Gamma | 0.000 | 0.001 | 0.002 | 0.006 |       | 0.000 | 0.011 | 0.000      |
|       | p     |       |       |       |       |       |       |       |            |
| Q     | pss17 | 0.754 | 0.587 | 0.771 | 0.470 | 0.663 |       | 0.897 | 0.687      |
|       | Gamma | 0.000 | 0.037 | 0.006 | 0.141 | 0.000 |       | 0.002 | 0.000      |
|       | p     |       |       |       |       |       |       |       |            |
| R     | pss18 | 0.831 | 0.632 | 0.845 | 0.658 | 0.652 | 0.897 |       | 0.696      |
|       | Gamma | 0.003 | 0.091 | 0.018 | 0.132 | 0.011 | 0.002 |       | 0.004      |
|       | p     |       |       |       |       |       |       |       |            |

Ordinary sample

| items              | A              | E              | F              | G              | H              | Q              | R              | rest score     |
|--------------------|----------------|----------------|----------------|----------------|----------------|----------------|----------------|----------------|
| A pss1 Gamma<br>p  |                | 0.899<br>0.002 | 0.976<br>0.000 | 0.779<br>0.015 | 0.595<br>0.000 | 0.941<br>0.000 | 0.877<br>0.030 | 0.834<br>0.000 |
| E pss5 Gamma<br>p  | 0.899<br>0.002 |                | 0.893<br>0.010 | 0.679<br>0.081 | 0.376<br>0.050 | 0.833<br>0.002 | 0.792<br>0.105 | 0.677<br>0.001 |
| F pss6 Gamma<br>p  | 0.976<br>0.000 | 0.893<br>0.010 |                | 0.695<br>0.078 | 0.700<br>0.001 | 0.904<br>0.000 | 0.934<br>0.026 | 0.898<br>0.000 |
| G pss7 Gamma<br>p  | 0.779<br>0.015 | 0.679<br>0.081 | 0.695<br>0.078 |                | 0.657<br>0.001 | 0.673<br>0.017 | 0.544<br>0.242 | 0.622<br>0.001 |
| H pss8 Gamma<br>p  | 0.595<br>0.000 | 0.376<br>0.050 | 0.700<br>0.001 | 0.657<br>0.001 |                | 0.638<br>0.000 | 0.488<br>0.074 | 0.553<br>0.000 |
| Q pss17 Gamma<br>p | 0.941<br>0.000 | 0.833<br>0.002 | 0.904<br>0.000 | 0.673<br>0.017 | 0.638<br>0.000 |                | 0.852<br>0.019 | 0.747<br>0.000 |
| R pss18 Gamma<br>p | 0.877<br>0.030 | 0.792<br>0.105 | 0.934<br>0.026 | 0.544<br>0.242 | 0.488<br>0.074 | 0.852<br>0.019 |                | 0.691<br>0.016 |

**Parental stress subscale**

**Behavior sample**

| items |                  | C              | D              | I              | J              | L              | M              | N              | O              | P              | rest score     |
|-------|------------------|----------------|----------------|----------------|----------------|----------------|----------------|----------------|----------------|----------------|----------------|
| C     | pss3 Gamma<br>p  |                | 0.635<br>0.007 | 0.685<br>0.000 | 0.553<br>0.004 | 0.748<br>0.000 | 0.548<br>0.002 | 0.305<br>0.159 | 0.453<br>0.006 | 0.678<br>0.000 | 0.660<br>0.000 |
| D     | pss4 Gamma<br>p  | 0.635<br>0.007 |                | 0.480<br>0.009 | 0.396<br>0.048 | 0.585<br>0.001 | 0.525<br>0.006 | 0.511<br>0.056 | 0.383<br>0.029 | 0.336<br>0.062 | 0.543<br>0.000 |
| I     | pss9 Gamma<br>p  | 0.685<br>0.000 | 0.480<br>0.009 |                | 0.617<br>0.000 | 0.703<br>0.000 | 0.595<br>0.000 | 0.624<br>0.002 | 0.300<br>0.012 | 0.557<br>0.000 | 0.621<br>0.000 |
| J     | pss10 Gamma<br>p | 0.553<br>0.004 | 0.396<br>0.048 | 0.617<br>0.000 |                | 0.659<br>0.000 | 0.399<br>0.007 | 0.750<br>0.001 | 0.348<br>0.012 | 0.413<br>0.006 | 0.546<br>0.000 |
| L     | pss12 Gamma<br>p | 0.748<br>0.000 | 0.585<br>0.001 | 0.703<br>0.000 | 0.659<br>0.000 |                | 0.443<br>0.000 | 0.624<br>0.001 | 0.528<br>0.000 | 0.592<br>0.000 | 0.667<br>0.000 |
| M     | pss13 Gamma<br>p | 0.548<br>0.002 | 0.525<br>0.006 | 0.595<br>0.000 | 0.399<br>0.007 | 0.443<br>0.000 |                | 0.684<br>0.001 | 0.229<br>0.052 | 0.482<br>0.000 | 0.496<br>0.000 |
| N     | pss14 Gamma<br>p | 0.305<br>0.159 | 0.511<br>0.056 | 0.624<br>0.002 | 0.750<br>0.001 | 0.624<br>0.001 | 0.684<br>0.001 |                | 0.226<br>0.153 | 0.557<br>0.007 | 0.549<br>0.000 |
| O     | pss15 Gamma<br>p | 0.453<br>0.006 | 0.383<br>0.029 | 0.300<br>0.012 | 0.348<br>0.012 | 0.528<br>0.000 | 0.229<br>0.052 | 0.226<br>0.153 |                | 0.581<br>0.000 | 0.436<br>0.000 |
| P     | pss16 Gamma<br>p | 0.678<br>0.000 | 0.336<br>0.062 | 0.557<br>0.000 | 0.413<br>0.006 | 0.592<br>0.000 | 0.482<br>0.000 | 0.557<br>0.007 | 0.581<br>0.000 |                | 0.587<br>0.000 |

ordinary sample

| items |                  | C              | D              | I              | J              | L              | M              | N              | O              | P              | rest score     |
|-------|------------------|----------------|----------------|----------------|----------------|----------------|----------------|----------------|----------------|----------------|----------------|
| C     | pss3 Gamma<br>p  |                | 0.754<br>0.000 | 0.613<br>0.000 | 0.516<br>0.000 | 0.668<br>0.000 | 0.622<br>0.000 | 0.139<br>0.244 | 0.478<br>0.000 | 0.379<br>0.002 | 0.654<br>0.000 |
| D     | pss4 Gamma<br>p  | 0.754<br>0.000 |                | 0.304<br>0.002 | 0.261<br>0.026 | 0.429<br>0.000 | 0.453<br>0.000 | 0.606<br>0.001 | 0.482<br>0.000 | 0.213<br>0.074 | 0.479<br>0.000 |
| I     | pss9 Gamma<br>p  | 0.613<br>0.000 | 0.304<br>0.002 |                | 0.639<br>0.000 | 0.590<br>0.000 | 0.504<br>0.000 | 0.360<br>0.017 | 0.479<br>0.000 | 0.506<br>0.000 | 0.566<br>0.000 |
| J     | pss10 Gamma<br>p | 0.516<br>0.000 | 0.261<br>0.026 | 0.639<br>0.000 |                | 0.594<br>0.000 | 0.467<br>0.000 | 0.123<br>0.283 | 0.306<br>0.003 | 0.727<br>0.000 | 0.520<br>0.000 |
| L     | pss12 Gamma<br>p | 0.668<br>0.000 | 0.429<br>0.000 | 0.590<br>0.000 | 0.594<br>0.000 |                | 0.507<br>0.000 | 0.470<br>0.002 | 0.374<br>0.000 | 0.667<br>0.000 | 0.590<br>0.000 |
| M     | pss13 Gamma<br>p | 0.622<br>0.000 | 0.453<br>0.000 | 0.504<br>0.000 | 0.467<br>0.000 | 0.507<br>0.000 |                | 0.431<br>0.010 | 0.330<br>0.000 | 0.547<br>0.000 | 0.495<br>0.000 |
| N     | pss14 Gamma<br>p | 0.139<br>0.244 | 0.606<br>0.001 | 0.360<br>0.017 | 0.123<br>0.283 | 0.470<br>0.002 | 0.431<br>0.010 |                | 0.618<br>0.000 | 0.837<br>0.000 | 0.515<br>0.000 |
| O     | pss15 Gamma<br>p | 0.478<br>0.000 | 0.482<br>0.000 | 0.479<br>0.000 | 0.306<br>0.003 | 0.374<br>0.000 | 0.330<br>0.000 | 0.618<br>0.000 |                | 0.657<br>0.000 | 0.454<br>0.000 |
| P     | pss16 Gamma<br>p | 0.379<br>0.002 | 0.213<br>0.074 | 0.506<br>0.000 | 0.727<br>0.000 | 0.667<br>0.000 | 0.547<br>0.000 | 0.837<br>0.000 | 0.657<br>0.000 |                | 0.623<br>0.000 |
